# Supplementary material for: Enhanced proliferation and differentiation of retinal progenitor cells through a self-healing injectable hydrogel
Source: Royal Society of Chemistry journal article supplement (doi:10.1039/c8bm01579a), 2019-01-01
Supplement: c8bm01579a1.pdf [file c8bm01579a1.pdf]

## Supporting Information

# Enhanced proliferation and differentiation of retinal progenitor cells through a self-healing injectable hydrogel

Fang Jiang,<sup>#a</sup> Zhimin Tang,<sup>#b,c</sup> Yuanhao Zhang,<sup>a</sup> Yahan Ju,<sup>b,c</sup> Huiqin Gao,<sup>b,c</sup> Na Sun,<sup>b,c</sup> Feng Liu,<sup>a</sup> Ping Gu,<sup>\*b,c</sup> and Weian Zhang<sup>\*a</sup>

<sup>a</sup>Shanghai Key Laboratory of Functional Materials Chemistry, East China University of Science and Technology, 130 Meilong Road, Shanghai, 200237, P. R. China.

*E-mail:* wazhang@ecust.edu.cn; *Tel:* +86 021 64253033

<sup>b</sup>Department of Ophthalmology, Ninth People's Hospital, Shanghai Jiao Tong University School of Medicine, Shanghai, 200011, P.R. China

*E-mail:* guping2009@126.com; *Tel/Fax:* +86 021 63137148.

<sup>c</sup>Shanghai Key Laboratory of Orbital Diseases and Ocular Oncology, Shanghai, 200011, P.R. China.

# These authors contributed equally to this work and should be considered as co-first authors.

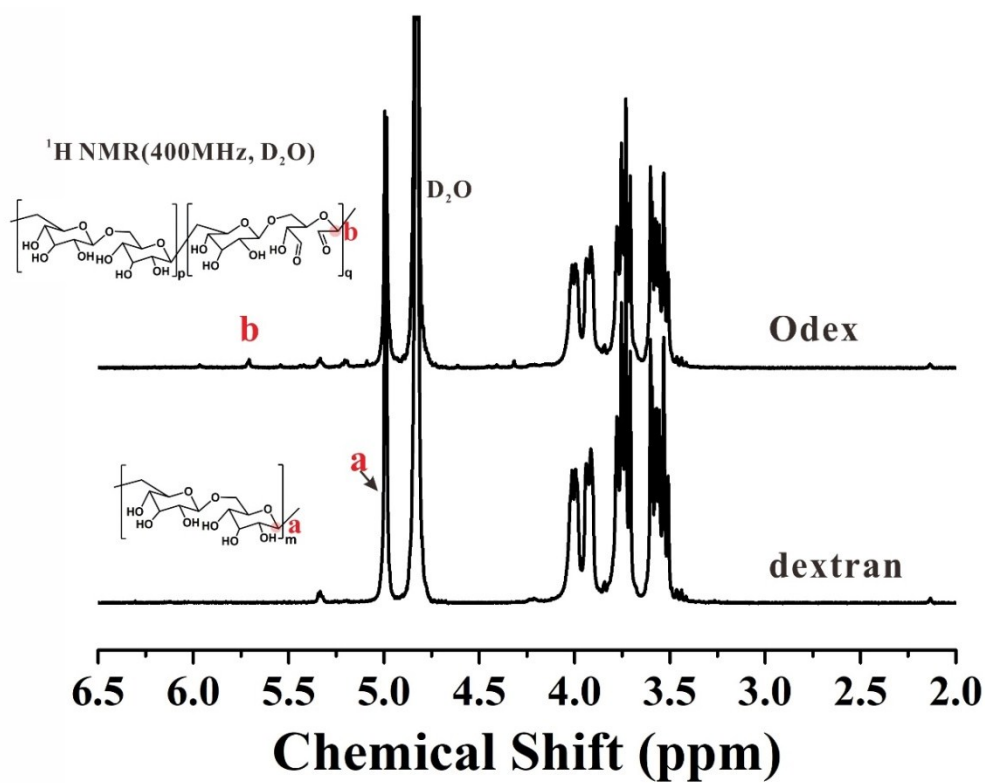

**Fig. S1.** The <sup>1</sup>H NMR spectra of dextran and Odex and a new peak appeared in Odex (referred to "b") as the consequence of oxidation.

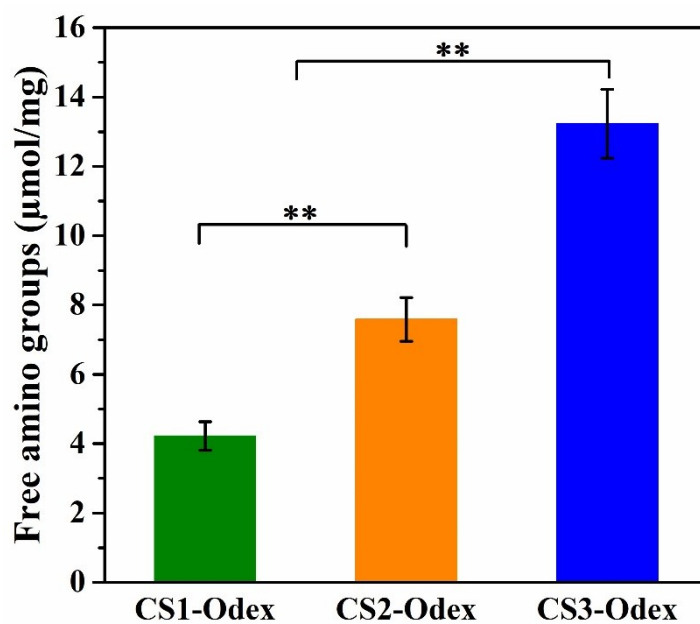

**Fig. S2.** Remaining amino groups in the CS-Odex hydrogel (\*\*P < 0.01).

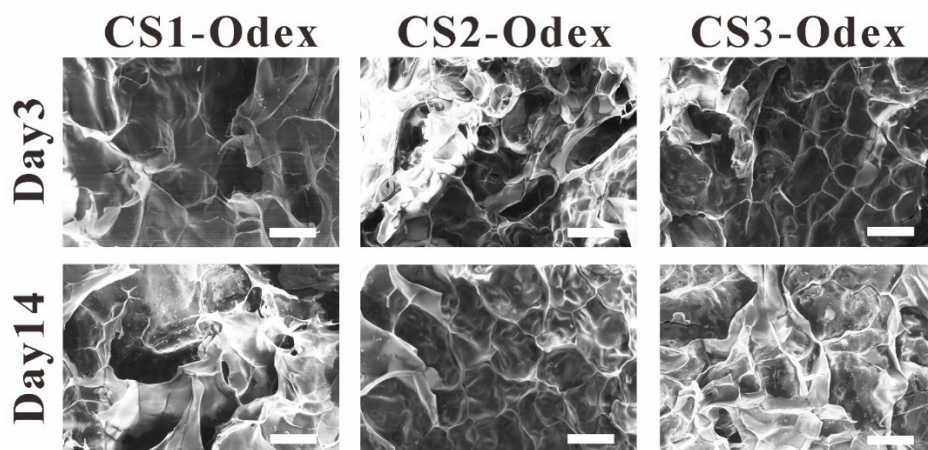

**Fig. S3.** SEM images of the CS-Odex hydrogel degraded in the PBS 7.4 at 37 °C by day 3 and 14. Scar bar:200  $\mu\text{m}$ .

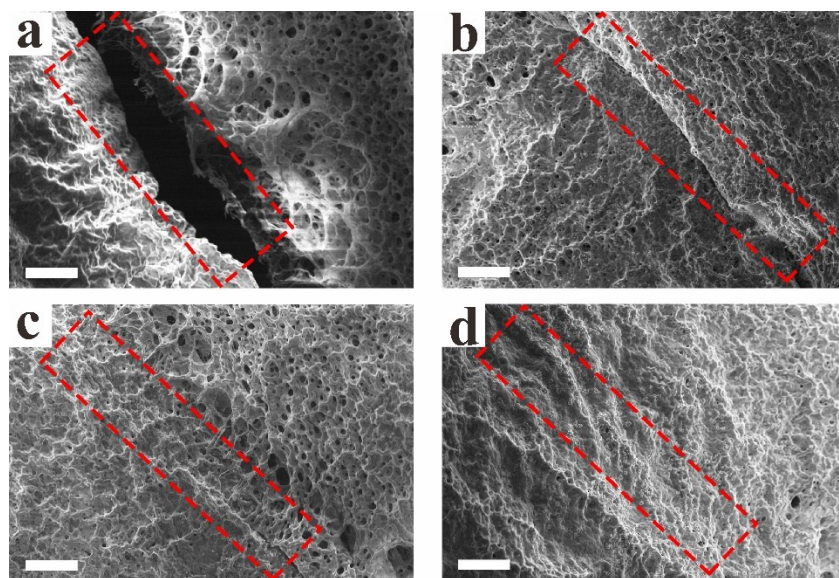

**Fig. S4.** SEM images of the CS2-Odex hydrogel after being self-healed for (a) 0 min, (b) 10 min, (c) 30 min, and (d) 60 min. Dotted area: boundary of the two halves of the hydrogel. Scar bar: 50  $\mu\text{m}$ .

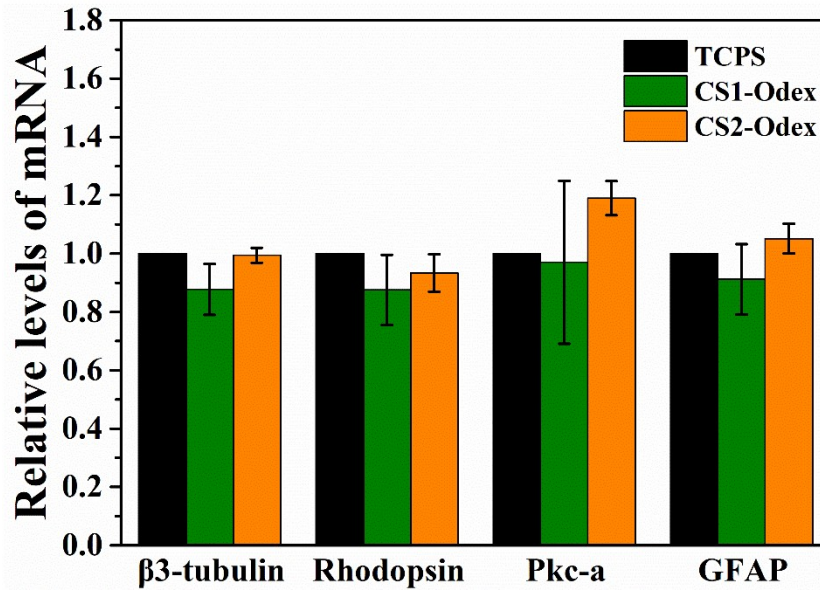

**Fig. S5.** Relative gene expression levels of  $\beta$ 3-tubulin (neuron marker), Rhodopsin (photoreceptor marker), Pkc-a (bipolar cell marker), and GFAP (glial marker) of RPCs by seeding cells on the hydrogel directly tested *via* qPCR.

**Table. S1** Primers used for qPCR.

| Genes            | Accession number | Forward (5-3')         | Reverse (5-3')        | Annealing Temperature (°C) | Product size (base pairs) |
|------------------|------------------|------------------------|-----------------------|----------------------------|---------------------------|
| Ki-67            | X82786           | cagtactcggaatgcagcaa   | cagtcttcaggggctctgtc  | 60                         | 170                       |
| Nestin           | NM_016701        | aactggcacctcaagatgt    | tcaagggtattaggcaagggg | 60                         | 235                       |
| Vimentin         | NM_011701        | tggttgacaccactcaaaa    | gcttttgggggtgtcagttgt | 60                         | 269                       |
| IL-6             | NM_031168.1      | aggagtggctaaggaccaaga  | ataacgcactaggttgccga  | 60                         | 100                       |
| MCP-1            | NM_011333.3      | acctgctgctactcattcacc  | attccttcttggggtcagca  | 60                         | 148                       |
| Casepase-3       | NM_004346        | catggaagcgaatcaatggact | ctgtaccagaccgagatgtca | 60                         | 139                       |
| $\beta$ 3-tublin | NM_023279        | cgagacctactgcatcgaca   | cattgagctgaccaggaat   | 60                         | 152                       |
| Rhodopsin        | NM_145383        | tcaccaccacctctacaca    | tgatccaggtgaagaccaca  | 60                         | 216                       |
| Pkc- $\alpha$    | NM_011101        | cccattccagaaggagatga   | ttcctgtcagcaagcatcac  | 60                         | 212                       |

---

|                |           |                      |                      |    |     |
|----------------|-----------|----------------------|----------------------|----|-----|
| GFAP           | NM_010277 | agaaaaccgcatcaccattc | tcacatcaccacgtccttgt | 60 | 184 |
| $\beta$ -actin | NM_007393 | agccatgtacgtagccatcc | ctctcagctgtggtggtgaa | 60 | 152 |

---
